# Supplementary material for: Terahertz and infrared characteristic absorption spectra of aqueous glucose and fructose solutions
Source: PubMed Central journal article supplement (PMC5997655; doi:10.1038/s41598-018-27310-7), 2018-06-12
Supplement: 41598_2018_27310_MOESM1_ESM.pdf [file 41598_2018_27310_MOESM1_ESM.pdf]

# Supplementary Information for Terahertz and infrared characteristic absorption spectra of aqueous glucose and fructose solutions

*Chao Song<sup>1,2</sup>, Wen-Hui Fan<sup>1,\*</sup>, Ling Ding<sup>1,2</sup>, Xu Chen<sup>1,2</sup>, Ze-You Chen<sup>1,2</sup> and Kai Wang<sup>1,2</sup>*

<sup>1</sup> State Key Laboratory of Transient Optics and Photonics, Xi'an Institute of Optics  
and Precision Mechanics, Chinese Academy of Sciences, Xi'an 710119, China

<sup>2</sup> University of Chinese Academy of Sciences, Beijing 100049, China

\* To whom correspondence should be addressed. \* fanwh@opt.ac.cn

To qualitatively clarify the effect of surrounding environment on the molecular structure and vibrational mode, the relevant theoretical calculation based on isolated-molecules and unit cells of solid-state glucose and fructose were also carried out at the meantime of our experimental measurements of glucose and fructose based on THz-TDS and FTIR. The calculations based on isolated-molecules utilized linear combination theory of atomic orbitals with Moller-Plesset perturbation theory (MP2)<sup>1</sup> and Becke-Three-Lee-Yang-Parr (B3LYP) functional<sup>2</sup> with the 6-311+G (d, p) Gaussian basis set, respectively. The calculations based on unit cell used the plane-wave density functional theory (DFT) with generalized gradient approximation (GGA)<sup>3</sup>. Specifically, the Perdew-Burke-Ernzerhof (PBE)<sup>4</sup> and Perdew-Wang (PW91)<sup>5</sup> exchange correlation functional were used in the calculations based on unit cell. Norm-conserving Kleinman-Bylander pseudopotentials<sup>6</sup> were utilized to describe electron-ion interactions. The plane-wave cutoff energy was set to 1200 eV; the total energy was converged to  $10^{-8}$  eV/atom; the maximum forces between atoms were less than  $10^{-5}$  eV/Å. Moreover, all the optimization of the crystal structures was conducted within the constraints of the unit cell. Compared with the experimental measurement of absorption features of solid-state glucose and fructose, Table S1, Table S2, Table S3 and Table S4 give a clear explanation about the origin of corresponding absorption peaks.

**Table S1. The assignment of the THz absorption features and mode description of solid-state glucose**

| Experiment<br>(THz) | Theoretical calculation of vibration modes (THz) |                                    |                         |                          | Mode description                                       |
|---------------------|--------------------------------------------------|------------------------------------|-------------------------|--------------------------|--------------------------------------------------------|
|                     | MP2<br>( isolated-<br>molecule )                 | B3LYP<br>( isolated-<br>molecule ) | PBE<br>( unit<br>cell ) | PW91<br>( unit<br>cell ) |                                                        |
| 1.27                | -                                                | -                                  | 1.26                    | -                        | Translational motion of molecules along <i>a</i> -axis |
| 1.42                | -                                                | -                                  | 1.50                    | 1.37                     | Rotation of molecules around <i>a</i> -axis            |
| 1.78                | -                                                | -                                  | 1.75                    | 1.70                     | Rotation of molecules around <i>c</i> -axis            |
| 2.05                | 1.98                                             | 1.93                               | 2.03                    | 2.10                     | Twisting of -CH <sub>2</sub> OH                        |
| -                   | -                                                | -                                  | 2.18                    | 2.21                     | Rotation of molecules around <i>b</i> -axis            |
| 2.51                | -                                                | -                                  | 2.38                    | 2.35                     | Translational motion of molecules along <i>b</i> -axis |
| -                   | -                                                | -                                  | 2.46                    | -                        | Rotation of molecules around <i>c</i> -axis            |
| 2.64                | 2.90                                             | 2.68                               | 2.47                    | 2.43                     | Twisting of -CH <sub>2</sub> OH                        |
| 2.91                | 3.23                                             | 3.09                               | 2.70                    | 2.75                     | Twisting of -CH <sub>2</sub> OH                        |
| -                   | -                                                | -                                  | 2.87                    | 2.95                     | Translational motion of molecules along <i>c</i> -axis |
| -                   | -                                                | -                                  | 3.10                    | -                        | Rotation of molecules around <i>c</i> -axis            |
| -                   | -                                                | -                                  | 3.15                    | -                        | Translational motion of molecules along <i>a</i> -axis |
| 3.32                | -                                                | -                                  | 3.35                    | 3.10                     | Rotation of molecules around <i>a</i> -axis            |
| 3.48                | -                                                | -                                  | 3.69                    | 3.49                     | Rotation of molecules around <i>b</i> -axis            |
| 3.74                | -                                                | -                                  | 3.88                    | 3.60                     | Rotation of molecules around <i>a</i> -axis            |

**Table S2. The assignment of the THz absorption features and mode description of solid-state fructose**

| Experiment<br>(THz) | Theoretical calculation of vibration modes (THz) |                                  |                       |                        | Mode description                                        |
|---------------------|--------------------------------------------------|----------------------------------|-----------------------|------------------------|---------------------------------------------------------|
|                     | MP2<br>(isolated-<br>molecule)                   | B3LYP<br>(isolated-<br>molecule) | PBE<br>(unit<br>cell) | PW91<br>(unit<br>cell) |                                                         |
| 1.69                | -                                                | -                                | 1.74                  | 1.71                   | Translational motion of molecules along <i>a</i> - axis |
| -                   | -                                                | -                                | 1.90                  | -                      | Translational motion of molecules along <i>c</i> - axis |
| 2.12                | 2.30                                             | 2.27                             | 2.10                  | 2.08                   | Deformation of carbon ring                              |
| 2.43                | -                                                | -                                | 2.29                  | 2.26                   | Rotation of molecules around <i>b</i> -axis             |
|                     |                                                  |                                  | 2.32                  | 2.31                   | Rotation of molecules around <i>b</i> -axis             |
| 2.65                | -                                                | -                                | 2.53                  | 2.46                   | Rotation of molecules around <i>c</i> -axis             |
| -                   | -                                                | -                                | 2.64                  | 2.53                   | Rotation of molecules around <i>c</i> -axis             |
| 2.95                | 2.98                                             | 2.98                             | 2.97                  | 3.18                   | Twisting of -CH <sub>2</sub> OH                         |
| -                   | -                                                | -                                | 3.01                  | 3.24                   | Translational motion of molecules along <i>b</i> - axis |
| 3.24                | -                                                | -                                | 3.28                  | 3.55                   | Rotation of molecules around <i>b</i> -axis             |
| 3.56                | 3.64                                             | 3.65                             | 3.56                  | 3.85                   | Twisting of -CH <sub>2</sub> OH                         |
| 3.68                | -                                                | -                                | 3.64                  | 3.89                   | Rotation of molecules around <i>c</i> -axis             |
| 3.84                | -                                                | -                                | 3.72                  | -                      | Rotation of molecules around <i>b</i> -axis             |

**Table S3. The assignment of the IR absorption features and mode description of solid-state glucose**

| Experiment<br>( $\text{cm}^{-1}$ ) | Theoretical calculation of vibration modes ( $\text{cm}^{-1}$ ) |                                  |                       |                        | Mode description                       |
|------------------------------------|-----------------------------------------------------------------|----------------------------------|-----------------------|------------------------|----------------------------------------|
|                                    | MP2<br>(isolated-<br>molecule)                                  | B3LYP<br>(isolated-<br>molecule) | PBE<br>(unit<br>cell) | PW91<br>(unit<br>cell) |                                        |
| 628.8                              | 604.4                                                           | 588.8                            | 618.6                 | 610.6                  | Wagging of O-H                         |
| 686.6                              | 645.8                                                           | 626.4                            | 691.6                 | -                      | Wagging of O-H                         |
| 783.1                              | 781.4                                                           | -                                | 743.9                 | 702.9                  | Wagging of O-H                         |
| 817.8                              | -                                                               | -                                | 797.2                 | 751.2                  | Deformation of carbon<br>ring          |
| 875.6                              | 874.2                                                           | -                                | 829.6                 | 843.2                  | Wagging of O-H                         |
| 923.9                              | 918.0                                                           | 917.4                            | 1010.6                | 1032.6                 | Stretching of C-C                      |
| 977.9                              | 1028.4                                                          | 1009.6                           | 1061.6                | 1074.6                 | Deformation of $-\text{CH}_2\text{OH}$ |
| 1080.1                             | 1099.0                                                          | 1065.8                           | 1103.2                | 1093.6                 | Deformation of carbon<br>ring          |
| 1147.6                             | 1142.6                                                          | 1094.4                           | 1133.9                | 1120.2                 | Stretching of C-H                      |
| 1176.5                             | 1179.2                                                          | 1149.2                           | 1171.9                | 1166.6                 | Wagging of C-H                         |
| 1265.2                             | 1268.6                                                          | 1236.4                           | 1237.6                | 1227.9                 | Wagging of C-H                         |
| 1338.5                             | 1329.4                                                          | 1330.0                           | 1348.6                | 1364.2                 | Wagging of C-H                         |
| 1624.0                             | -                                                               | -                                | -                     | -                      | -                                      |
| 2030.0                             | -                                                               | -                                | -                     | -                      | -                                      |
| 2898.9                             | 3050.2                                                          | 2956.0                           | 2873.9                | 2811.6                 | Stretching of C-H                      |
| 2933.6                             | 3111.8                                                          | 3006.8                           | 2919.9                | 2871.6                 | Symmetrical stretching<br>of H-C-H     |
| 3200.0                             | -                                                               | -                                | 3153.9                | 3040.9                 | Stretching of O-H                      |
| -                                  | -                                                               | -                                | 3176.6                | 3073.6                 | Stretching of O-H                      |
| 3450.0                             | -                                                               | -                                | 3265.2                | 3212.6                 | Stretching of O-H                      |
| -                                  | -                                                               | -                                | 3298.6                | 3327.9                 | Stretching of O-H                      |
| -                                  | -                                                               | -                                | 3331.6                | 3446.9                 | Stretching of O-H                      |

**Table S4. The assignment of the IR absorption features and mode description of solid-state fructose**

| Experiment<br>( $\text{cm}^{-1}$ ) | Theoretical calculation of vibration modes ( $\text{cm}^{-1}$ ) |                                  |                       |                        | Mode description                    |
|------------------------------------|-----------------------------------------------------------------|----------------------------------|-----------------------|------------------------|-------------------------------------|
|                                    | MP2<br>(isolated-<br>molecule)                                  | B3LYP<br>(isolated-<br>molecule) | PBE<br>(unit<br>cell) | PW91<br>(unit<br>cell) |                                     |
| 538.1                              | 514.0                                                           | 521.0                            | 514.1                 | 513.9                  | Wagging of O-H                      |
| 623.0                              | 630.2                                                           | 633.4                            | 628.9                 | 628.1                  | Wagging of O-H                      |
| 694.3                              | -                                                               | -                                | 662.5                 | 663.0                  | Wagging of O-H                      |
| 786.9                              | 783.2                                                           | 784.8                            | 760.5                 | 761.0                  | Twisting of $-\text{CH}_2\text{OH}$ |
| 815.9                              | 813.0                                                           | 812.5                            | 805.4                 | 795.3                  | Deformation of carbon<br>ring       |
| 873.7                              | 867.4                                                           | 866.2                            | 867.3                 | 875.7                  | Twisting of $-\text{CH}_2\text{OH}$ |
| 923.9                              | 921.6                                                           | 914.2                            | 931.7                 | 930.9                  | Wagging of C-H                      |
| 975.9                              | 981.0                                                           | 981.8                            | 981.3                 | 990.1                  | Wagging of C-H                      |
| 1089.7                             | 1047.6                                                          | 1048.2                           | 1048.5                | 1057.3                 | Wagging of C-H and<br>O-H           |
| -                                  | 1097.0                                                          | 1097.8                           | 1096.9                | 1105.3                 | Wagging of C-H and<br>O-H           |
| -                                  | 1136.0                                                          | 1123.6                           | 1136.1                | 1144.5                 | Wagging of C-H and<br>O-H           |
| 1265.2                             | 1247.8                                                          | 1249.4                           | 1250.1                | 1258.5                 | Twisting of $-\text{CH}_2\text{OH}$ |
| 1338.5                             | 1372.0                                                          | 1358.6                           | 1327.3                | 1326.7                 | Wagging of C-H and<br>O-H           |
| 1400.3                             | 1414.8                                                          | 1413.6                           | 1386.5                | 1387.1                 | Twisting of $-\text{CH}_2\text{OH}$ |
| 1637.5                             | -                                                               | -                                | 1627.3                | 1617.3                 | Deformation of carbon<br>ring       |
| 2025.1                             | -                                                               | -                                | -                     | -                      | -                                   |
| 2900.8                             | 2978.2                                                          | 2979.0                           | 2978.9                | 2987.3                 | Stretching of C-H                   |
| 3192.1                             | -                                                               | -                                | 3464.5                | 3465.7                 | Stretching of O-H                   |
| 3429.3                             | 3802.6                                                          | 3825.8                           | 3779.3                | 3781.2                 | Stretching of O-H                   |
| -                                  | 3830.4                                                          | 3837.2                           | 3867.7                | 3865.7                 | Stretching of O-H                   |

## References

1. Head-Gordon, M., Pople, J. A. & Frisch, M. J. MP2 energy evaluation by direct methods. *Chem. Phys. Lett.* **153**, 503-506 (1988).
2. Becke, A. D. Density-functional thermochemistry. III. The role of exact exchange. *J. Chem. Phys.* **98**, 5648-5652 (1993).
3. Clark, S. J. *et al.* First principles methods using CASTEP. *Zeitschrift Für Kristallographie* **220**, 567-570 (2005).
4. Perdew, J. P., Burke, K. & Ernzerhof, M. Generalized Gradient Approximation Made Simple. *Phys. Rev. Lett.* **77**, 3865-3868 (1998).
5. Perdew, J. P. *et al.* Atoms, molecules, solids, and surfaces: Applications of the generalized gradient approximation for exchange and correlation. *Phys. Rev. B* **46**, 6671-6687 (1993).
6. Kleinman, L. & Bylander, D. M. Efficacious Form for Model Pseudopotentials. *Phys. Rev. Lett.* **48**, 1425 (1982).
